# Supplementary material
Source: Research Square preprint supplement (doi:10.21203/rs.3.rs-8961524/v1)
Supplement: Supplementary file 1 [file 13eadccfca15fab46f39025a.docx]

**S1 Table.** Primers used for detection of ESBL, AmpC and carbapenemase-encoding genes

| Gene category | Primers | Nucleotide sequence (5’🡪 3’) | GenBank n° | Product size (bp) | Reference |
| --- | --- | --- | --- | --- | --- |
| ESBL | CTX-M-F CTX-M-R | CGCTGTTGTTAGGAAGTGTG  GGCTGGGTGAAGTAAGTGAC | DQ303459 | 754 | [1] |
| SHV-F  SHV-R | CGCCTGTGTATTATCTCCCT CGAGTAGTCCACCAGATCCT | EF125011 | 293 | [1] |
| TEM-F TEM-R | TTTCGTGTCGCCCTTATTCC ATCGTTGTCAGAAGTAAGTTGG | AB282997 | 403 | [1] |
| AmpC-β-lactamase | DHA-F  DHA-R | AACTTTCACAGGTGTGCTGGGT  CCGTACGCATACTGGCTTTGC | Y16410 | 405 | [2] |
| FOX-F  FOX-R | AACATGGGGTATCAGGGAGATG  CAAAGCGCGTAACCGGATTGG | X77455 | 190 | [2] |
| Carbapenemase | OXA-F  OXA-R | GCGTGGTTAAGGATGAACAC  CATCAAGTTCAACCCAACCG | - | 438 | [3] |
| NDM-F  NDM-R | GGTTTGGCGATCTGGTTTTC  CGGAATGGCTCATCACGATC | - | 621 | [3] |
| VIM-F VIM-R | GATGGTGTTTGGTCGCAT  ACGAATGCGCAGCACCAG | - | 390 | [3] |
| KPC-F  KPC-R | CGTCTAGTTCTGCTGTCTTG  CTTGTCATCCTTGTTAGGCG | - | 798  232 | [3] |
| IMP-F IMP-R | GGAATAGAGTGGCTTAAYTCTC GGTTTAAYAAAACAACCACC | - | 232 | [3] |

**References**

1. Seman A, Mihret A, Sebre S, Awoke T, Yitayew B, Aseffa A, et al. Prevalence and Molecular Characterization of Extended Spectrum β-Lactamase and Carbapenemase-Producing Enterobacteriaceae Isolates from Bloodstream Infection Suspected Patients in Addis Ababa, Ethiopia. Infect Drug Resist. 2022;15: 1367–1382. doi:10.2147/IDR.S349566

2. Pérez-Pérez FJ, Hanson ND. Detection of plasmid-mediated AmpC β-lactamase genes in clinical isolates by using multiplex PCR. J Clin Microbiol. 2002;40: 2153–2162. doi:10.1128/JCM.40.6.2153-2162.2002

3. Poirel L, Walsh TR, Cuvillier V, Nordmann P. Multiplex PCR for detection of acquired carbapenemase genes. Diagn Microbiol Infect Dis. 2011;70: 119–123. doi:10.1016/j.diagmicrobio.2010.12.002
