# Supplementary material
Source: Research Square preprint supplement (doi:10.21203/rs.3.rs-8961524/v1)
Supplement: Supplementary file 2 [file d9a421d65c8437f26ab4d6a5.docx]

**S2 Table.** Reaction components and thermal cycling parameters for resistance gene PCR assays

| **Parameter** | **ESBL genes (215 colonies)** | **Carbapenemase genes (6 colonies)** | **ESBL-AmpC genes (3 colonies)** |
| --- | --- | --- | --- |
| **Master mix** | 4 µL GoTaq® 2X | 4 µL GoTaq® 2X | 4 µL GoTaq® 2X |
| **Primers (each)** | 0.75 µL (10µM) | 0.75 µL (10µM) | 0.75 µL (10µM) |
| **H₂O** | 16.5 µL | 14 µL | 18.5 µL |
| **DNA template** | 5 µL | 5 µL | 5 µL |
| **Initial denaturation** | 94°C, 3 min | 94°C, 10 min | 94°C, 5 min |
| **Cycles** | 35 | 36 | 30 |
| **Denaturation** | 94°C, 45 s | 94°C, 30 s | 94°C, 30 s |
| **Annealing** | 60°C, 30 s | 52°C, 30 s | 64°C, 30 s |
| **Extension** | 72°C, 1 min | 72°C, 50 s | 72°C, 1 min |
| **Final extension** | 72°C, 3 min | 72°C, 5 min | 72°C, 10 min |
| **Total volume** | 30 µL | 30 µL | 25 µL |
